# Supplementary material for: Risk of Hepatocellular Carcinoma in Patients with Porphyria: A Systematic Review
Source: MDPI journal article supplement (doi:10.3390/cancers14122947), 2022-06-15
Supplement: s1 [file s1]

## Review

# Risk of Hepatocellular Carcinoma in Patients with Porphyrria: A Systematic Review

Daryl Ramai, Smit S. Deliwala, Saurabh Chandan, Janice Lester, Jameel Singh, Jayanta Samanta, Sara di Nunzio, Fabio Perversi, Francesca Cappellini, Aashni Shah, Michele Ghidini, Rodolfo Sacco, Antonio Facciorusso and Luca Giacomelli

**Table S1.** PRISMA checklist.

| Section/topic                      | #  | Checklist Item                                                                                                                                                                                                                                                                                              | Reported on page #            |
|------------------------------------|----|-------------------------------------------------------------------------------------------------------------------------------------------------------------------------------------------------------------------------------------------------------------------------------------------------------------|-------------------------------|
| <b>TITLE</b>                       |    |                                                                                                                                                                                                                                                                                                             |                               |
| Title                              | 1  | Identify the report as a systematic review, meta-analysis, or both.                                                                                                                                                                                                                                         | 1                             |
| <b>ABSTRACT</b>                    |    |                                                                                                                                                                                                                                                                                                             |                               |
| Structured summary                 | 2  | Provide a structured summary including, as applicable: background; objectives; data sources; study eligibility criteria, participants, and interventions; study appraisal and synthesis methods; results; limitations; conclusions and implications of key findings; systematic review registration number. | 3                             |
| <b>INTRODUCTION</b>                |    |                                                                                                                                                                                                                                                                                                             |                               |
| Rationale                          | 3  | Describe the rationale for the review in the context of what is already known.                                                                                                                                                                                                                              | 4                             |
| Objectives                         | 4  | Provide an explicit statement of questions being addressed with reference to participants, interventions, comparisons, outcomes, and study design (PICOS).                                                                                                                                                  | 5                             |
| <b>METHODS</b>                     |    |                                                                                                                                                                                                                                                                                                             |                               |
| Protocol and registration          | 5  | Indicate if a review protocol exists, if and where it can be accessed (e.g., Web address), and, if available, provide registration information including registration number.                                                                                                                               | Not registered                |
| Eligibility criteria               | 6  | Specify study characteristics (e.g., PICOS, length of follow-up) and report characteristics (e.g., years considered, language, publication status) used as criteria for eligibility, giving rationale.                                                                                                      | 6                             |
| Information sources                | 7  | Describe all information sources (e.g., databases with dates of coverage, contact with study authors to identify additional studies) in the search and date last searched.                                                                                                                                  | 5–6                           |
| Search                             | 8  | Present full electronic search strategy for at least one database, including any limits used, such that it could be repeated.                                                                                                                                                                               | 5–6 and supplementary table 2 |
| Study selection                    | 9  | State the process for selecting studies (i.e., screening, eligibility, included in systematic review, and, if applicable, included in the meta-analysis).                                                                                                                                                   | 6                             |
| Data collection process            | 10 | Describe method of data extraction from reports (e.g., piloted forms, independently, in duplicate) and any processes for obtaining and confirming data from investigators.                                                                                                                                  | 6                             |
| Data items                         | 11 | List and define all variables for which data were sought (e.g., PICOS, funding sources) and any assumptions and simplifications made.                                                                                                                                                                       | 5–6                           |
| Risk of bias in individual studies | 12 | Describe methods used for assessing risk of bias of individual studies (including specification of whether this was done at the study or outcome level), and how this information is to be used in any data synthesis.                                                                                      | 5–6                           |
| Summary measures                   | 13 | State the principal summary measures (e.g., risk ratio, difference in means).                                                                                                                                                                                                                               | 5–6                           |
| Synthesis of results               | 14 | Describe the methods of handling data and combining results of studies, if done, including measures of consistency (e.g., $I^2$ ) for each meta-analysis.                                                                                                                                                   | 6                             |
| <b>RESULTS</b>                     |    |                                                                                                                                                                                                                                                                                                             |                               |
| Risk of bias across studies        | 15 | Specify any assessment of risk of bias that may affect the cumulative evidence (e.g., publication bias, selective reporting within studies).                                                                                                                                                                | 9 and supplementary table 3   |
| Additional analyses                | 16 | Describe methods of additional analyses (e.g., sensitivity or subgroup analyses, meta-regression), if done, indicating which were pre-specified.                                                                                                                                                            | N/A                           |
| <b>RESULTS</b>                     |    |                                                                                                                                                                                                                                                                                                             |                               |
| Study selection                    | 17 | Give numbers of studies screened, assessed for eligibility, and included in the review, with reasons for exclusions at each stage, ideally with a flow diagram.                                                                                                                                             | 7–9                           |
| Study characteristics              | 18 | For each study, present characteristics for which data were extracted (e.g., study size, PICOS, follow-up period) and provide the citations.                                                                                                                                                                | 7–9                           |
| Risk of bias within studies        | 19 | Present data on risk of bias of each study and, if available, any outcome level assessment (see item 12).                                                                                                                                                                                                   | 7–9                           |

|                               |    |                                                                                                                                                                                                          |             |
|-------------------------------|----|----------------------------------------------------------------------------------------------------------------------------------------------------------------------------------------------------------|-------------|
| Results of individual studies | 20 | For all outcomes considered (benefits or harms), present, for each study: (a) simple summary data for each intervention group (b) effect estimates and confidence intervals, ideally with a forest plot. | 7–9         |
| Synthesis of results          | 21 | Present results of each meta-analysis done, including confidence intervals and measures of consistency.                                                                                                  | N/A         |
| Risk of bias across studies   | 22 | Present results of any assessment of risk of bias across studies (see Item 15).                                                                                                                          | See item 15 |
| Additional analysis           | 23 | Give results of additional analyses, if done (e.g., sensitivity or subgroup analyses, meta-regression [see Item 16]).                                                                                    | N/A         |
| <b>DISCUSSION</b>             |    |                                                                                                                                                                                                          |             |
| Summary of evidence           | 24 | Summarize the main findings including the strength of evidence for each main outcome; consider their relevance to key groups (e.g., healthcare providers, users, and policy makers).                     | 10–11       |
| Limitations                   | 25 | Discuss limitations at study and outcome level (e.g., risk of bias), and at review-level (e.g., incomplete retrieval of identified research, reporting bias).                                            | 11–12       |
| Conclusions                   | 26 | Provide a general interpretation of the results in the context of other evidence, and implications for future research.                                                                                  | 12          |
| <b>FUNDING</b>                |    |                                                                                                                                                                                                          |             |
| Funding                       | 27 | Describe sources of funding for the systematic review and other support (e.g., supply of data); role of funders for the systematic review.                                                               | 2 (None)    |

From: Moher D, Liberati A, Tetzlaff J, Altman DG, The PRISMA Group (2009). Preferred Reporting Items for Systematic Reviews and Meta-Analyses: The PRISMA Statement. PLoS Med 6(7): e1000097. doi:10.1371/journal.pmed1000097 For more information, visit: [www.prisma-statement.org](http://www.prisma-statement.org).

**Table S2.** Search Strategy.

#### PubMed

“carcinoma, hepatocellular” [mesh] OR “liver cell carcinoma” OR “hepatic cell carcinoma” OR “hepatocellular carcinoma” OR “hepatic carcinoma” OR “hepatocarcinoma” OR “hepatoma” OR “liver carcinoma” OR “liver neoplasms” [mesh] OR “HCC” OR “liver cancer”

“porphyrias” [mesh] OR “porphyria” OR “porphyrias” OR “porphyric disease” OR “porphyric” OR “protoporphyria, erythropoietic” [mesh]

#### Embase

“liver cell carcinoma”/exp OR “carcinoma, hepatic cell” OR “carcinoma, hepatocellular” OR “carcinoma, liver” OR “carcinoma, liver cell” OR “hepatic carcinoma” OR “hepatic cell carcinoma” OR “hepatocarcinoma” OR “hepatocellular carcinoma” OR “hepatoma” OR “liver carcinoma” OR “liver carcinoma rupture” OR “liver cell carcinoma” OR “malignant hepatoma” OR “primary liver carcinoma” or “liver tumor”/exp

“porphyria”/exp OR “intermittent porphyria” OR “latent porphyria” OR “porphyria” OR “porphyria, latent” OR “porphyrias” OR “porphyric disease” OR “systemic porphyria” not porphyrin\*

#### Web of Science

“Hepatocellular carcinoma” OR “hepatic cell carcinoma” OR “hepatic carcinoma” OR “hepatocarcinoma” OR “liver cancer\*” OR “HCC” OR “hepatic neoplasia” OR “hepatic neoplasias”

AND

porphyria\* or porphyric

**Table S3.** Quality Assessment using the Newcastle-Ottawa Scale (NOS).

| Study | Rep-<br>re-<br>senta-<br>tive-<br>ness | Selection | Ascertain-<br>ment of ex-<br>posure | Demonstration<br>that outcome<br>of interest was<br>not present at<br>start of study | Factors<br>compara-<br>ble be-<br>tween<br>groups? | Assessment<br>of outcome? | Follow-up | Adequacy of<br>follow-ups | Overall<br>Quality<br>Score |
|-------|----------------------------------------|-----------|-------------------------------------|--------------------------------------------------------------------------------------|----------------------------------------------------|---------------------------|-----------|---------------------------|-----------------------------|
|-------|----------------------------------------|-----------|-------------------------------------|--------------------------------------------------------------------------------------|----------------------------------------------------|---------------------------|-----------|---------------------------|-----------------------------|

|                         | Popu-<br>lation<br>based<br>? | Drawn from<br>same commu-<br>nity as exposed<br>cohort | Secured rec-<br>ords, clinical<br>outcomes | Not present | Yes? | Independent<br>blind assess-<br>ment, record<br>linkage | Mentioned<br>or not men-<br>tioned | Complete fol-<br>low-up, or sub-<br>jects lost to fol-<br>low-up un-<br>likely to intro-<br>duce bias | (Maximum<br>= 9) |
|-------------------------|-------------------------------|--------------------------------------------------------|--------------------------------------------|-------------|------|---------------------------------------------------------|------------------------------------|-------------------------------------------------------------------------------------------------------|------------------|
| Solis 1982<br>[13]      |                               | ★                                                      | ★                                          | ★           | ★    | ★                                                       | ★                                  |                                                                                                       | 6                |
| Hardell 1984<br>[14]    |                               | ★                                                      | ★                                          | ★           | ★    | ★                                                       | ★                                  |                                                                                                       | 6                |
| Lithner 1984<br>[15]    |                               | ★                                                      | ★                                          | ★           | ★    | ★                                                       | ★                                  |                                                                                                       | 6                |
| Salata 1985<br>[16]     |                               | ★                                                      | ★                                          | ★           | ★    | ★                                                       | ★                                  |                                                                                                       | 6                |
| Siersema<br>1992 [17]   |                               | ★                                                      | ★                                          | ★           | ★    | ★                                                       | ★                                  |                                                                                                       | 6                |
| Kauppinen<br>1992 [11]  |                               | ★                                                      | ★                                          | ★           | ★    | ★                                                       | ★                                  |                                                                                                       | 6                |
| Andersson<br>1996 [12]  |                               | ★                                                      | ★                                          | ★           | ★    | ★                                                       | ★                                  |                                                                                                       | 6                |
| Linnet 1999<br>[18]     |                               | ★                                                      | ★                                          | ★           | ★    | ★                                                       | ★                                  |                                                                                                       | 6                |
| Andant 2000<br>[4]      |                               | ★                                                      | ★                                          | ★           | ★    | ★                                                       | ★                                  | ★                                                                                                     | 7                |
| Lissing 2022<br>[23]    |                               | ★                                                      | ★                                          | ★           | ★    | ★                                                       | ★                                  |                                                                                                       | 6                |
| Fracanzani<br>2001 [19] |                               | ★                                                      | ★                                          | ★           | ★    | ★                                                       | ★                                  |                                                                                                       | 6                |
| Gisbert 2004<br>[20]    |                               | ★                                                      | ★                                          | ★           | ★    | ★                                                       | ★                                  |                                                                                                       | 6                |
| Cassiman<br>2008 [21]   |                               | ★                                                      | ★                                          | ★           | ★    | ★                                                       | ★                                  |                                                                                                       | 6                |
| Innala 2011<br>[8]      |                               | ★                                                      | ★                                          | ★           | ★    | ★                                                       | ★                                  | ★                                                                                                     | 7                |
| Sardh 2013<br>[10]      |                               | ★                                                      | ★                                          | ★           | ★    | ★                                                       | ★                                  |                                                                                                       | 6                |
| Elder 2013 [7]          |                               | ★                                                      | ★                                          | ★           | ★    | ★                                                       | ★                                  |                                                                                                       | 6                |
| Lang 2015<br>[22]       |                               | ★                                                      | ★                                          | ★           | ★    | ★                                                       |                                    |                                                                                                       | 5                |
| Baravelli 2019<br>[5]   |                               | ★                                                      | ★                                          | ★           | ★    | ★                                                       | ★                                  |                                                                                                       | 6                |
| Saberi 2020<br>[6]      |                               | ★                                                      | ★                                          | ★           | ★    | ★                                                       | ★                                  |                                                                                                       | 6                |
